# Supplementary material for: Strongly correlated excitonic insulator in atomic double layers
Source: Research Square preprint supplement (doi:10.21203/rs.3.rs-437885/v1), 2021-04-21
Supplement: Supplementary file 1 [file 265e62014b20074f396d3c6d.pdf]

## Extended Data Figures.

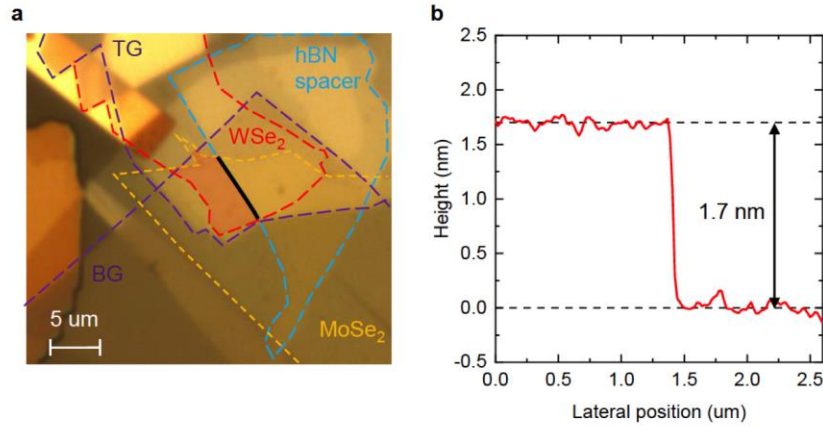

**Extended Data Figure 1 | Device image.** **a**, Optical image of the MoSe<sub>2</sub>/WSe<sub>2</sub> device presented in the main text (Device 1). The dashed lines mark the boundaries of the top and bottom graphite gates (purple), the MoSe<sub>2</sub> monolayer (yellow), the WSe<sub>2</sub> monolayer (red), and the thick hBN spacer in the contact region (light-blue). The thin hBN spacer that separates the two TMD layers is not shown. The black solid line marks the boundary of the contact region and the region of interest (shaded). **b**, Atomic force microscopy (AFM) profile of the thin BN spacer, showing a step height of  $\sim 1.7$  nm ( $\sim 6$ -layer).

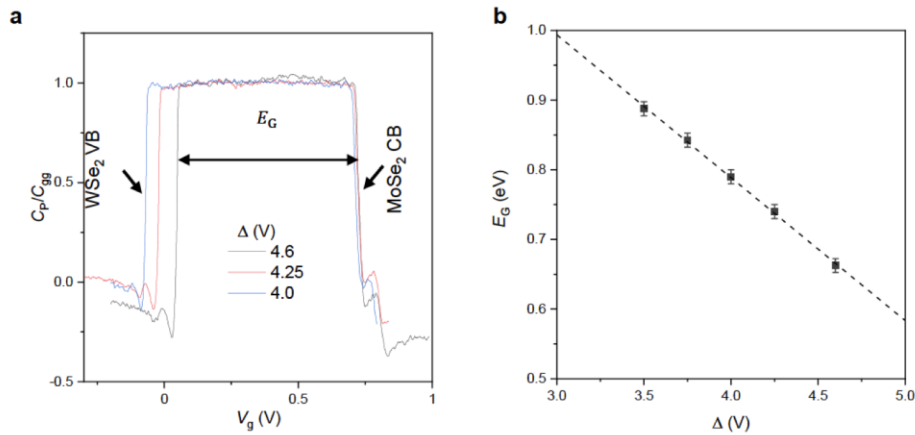

**Extended Data Figure 2 | Dependence of interlayer band gap on anti-symmetric gating.** **a**, Gate dependence of penetration capacitance at 15 K under varying anti-symmetric gating  $\Delta$  and  $V_b = 0$  V. The step falls signify electron doping into the MoSe<sub>2</sub> conduction band (CB) or hole doping into the WSe<sub>2</sub> valence band (VB). The separation between the rising and falling edges determines the band gap  $E_G$ . An additional step on the electron-doping side arises from the presence of a small non-overlapped MoSe<sub>2</sub> monolayer inside the dual-gated device that affects the penetration capacitance. **b**, Interlayer band gap  $E_G$  (symbols) extracted from **a** as a function of  $\Delta$ . The linear fit (dashed line) has a slope of  $\sim 0.21e$ . The gap energy extrapolated for  $\Delta = 0$  corresponds to the intrinsic band gap energy  $E_G^0 \approx 1.6$  eV.

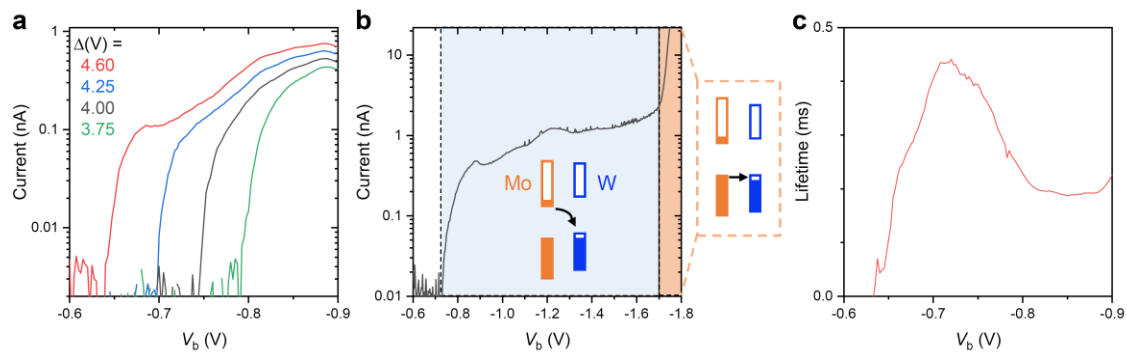

**Extended Data Figure 3 | Tunneling current and exciton lifetime.** **a**, Bias-dependent interlayer tunneling current of device 1 under  $\Delta = 4.6$  V (red), 4.25 V (blue), 4.00 V (black), and 3.75 V (green). The shift of the onset with  $\Delta$  is caused by the changing interlayer band gap. **b**, Interlayer tunneling current over a larger bias range at  $\Delta = 4$  V. The insets illustrate both the non-resonant (blue-shaded) and resonant (orange-shaded) tunneling regimes. **c**, Estimated exciton lifetime as a function of  $V_b$  from the tunneling data at  $\Delta = 4.6$  V in **a**.

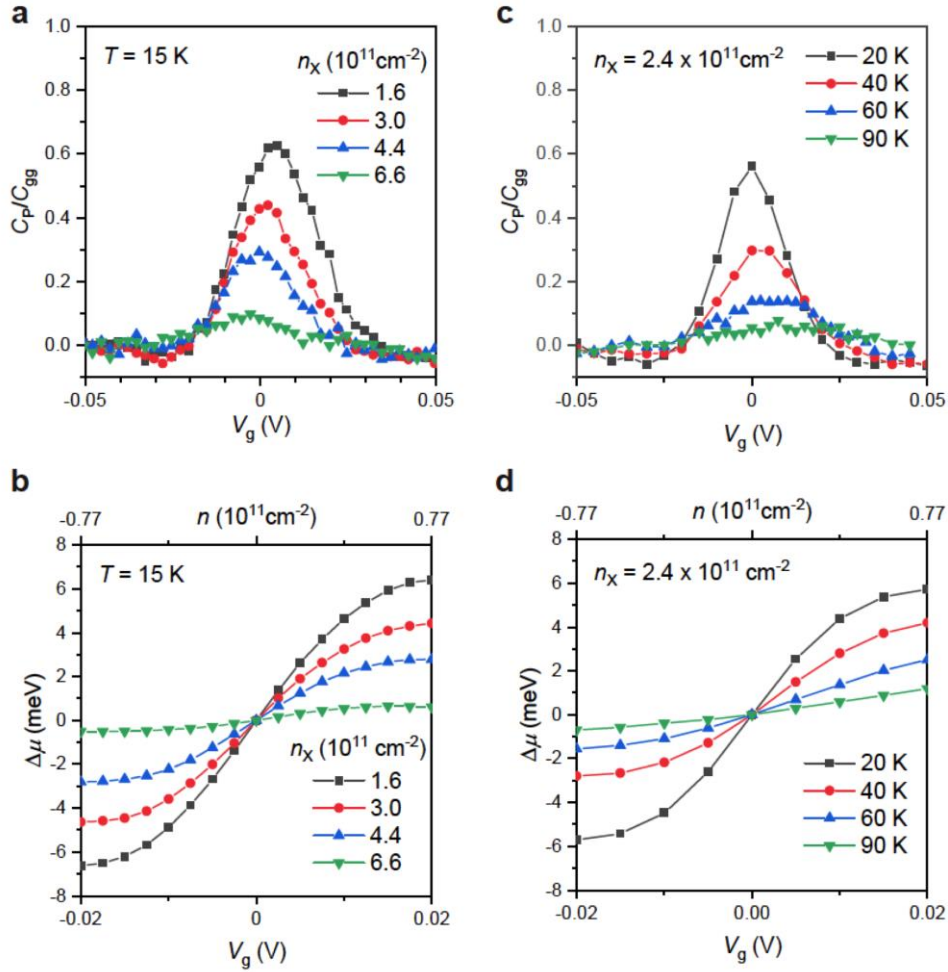

**Extended Data Figure 4 | Determination of the charge gap.** The penetration capacitance (a) and the charge chemical potential of the double layer (b) at 15 K as a function of  $V_g$  at varying exciton densities. The capacitance peak shows the presence of a charge-incompressible state. The integrated area of the peak gives the chemical potential jump (or the charge gap) at equal electron-hole density. The zero point of the chemical potential shift in b has been shifted to  $V_g = 0$  V for comparison of different exciton densities. The charge gap closes near the Mott density. c, d, Similar to a, b, at a fixed exciton density  $n_x = 2.4 \times 10^{11} \text{ cm}^{-2}$  for different temperatures. The charge gap closes at the ionization temperature.

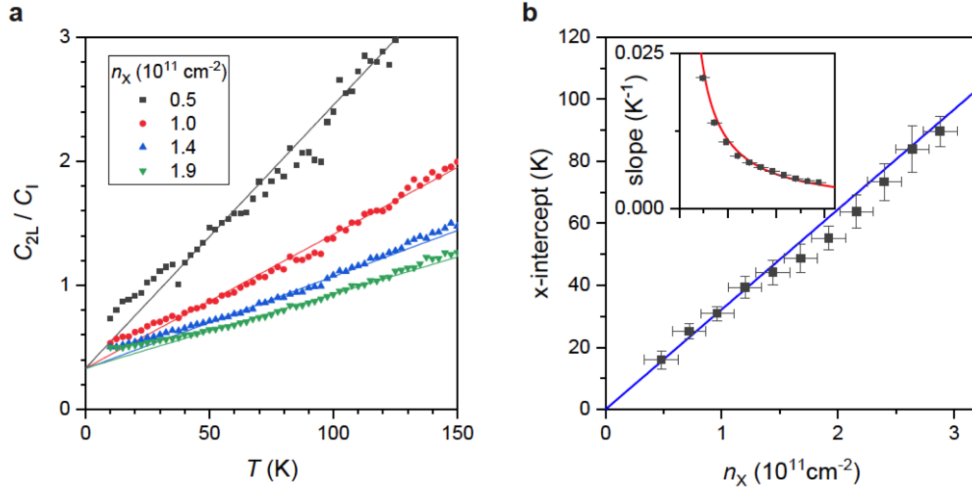

**Extended Data Figure 5 | Exciton compressibility in the high-temperature limit. a,** Inverse interlayer capacitance (or exciton compressibility) as a function of temperature at varying exciton densities. The lines are linear fits in the high-temperature limit, i.e.  $gn_x/k_B \lesssim T \lesssim T_s$ . **b,** Amplitude of the extracted  $x$ -intercept in **a** as a function of exciton density. A linear fit (blue) gives  $g = (2.6 \pm 0.1) \times 10^{-14}$  eVcm<sup>2</sup>. The inset shows the density dependence of the slope extracted from **a** (symbols). The red line is the mean-field result described in the main text. The density range is the same as in the main panel.

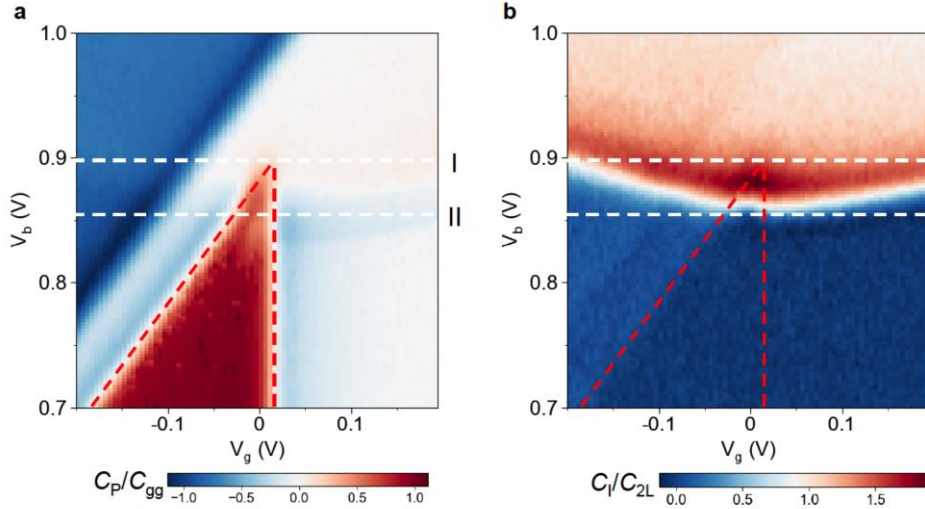

**Extended Data Figure 6 | Main results from device 2.** Penetration capacitance (**a**) and interlayer capacitance (**b**) as a function of bias and gate voltages. The Mo-layer is grounded. The two red dashed lines denote the conduction band edge of MoSe<sub>2</sub> (vertical line) and the valance band edge of WSe<sub>2</sub> (line with slope +1). The two white dashed lines denote the bias voltage at which the charge gap closes (I) and the exciton fluid becomes compressible (II). The difference between the two values ( $\sim 40$  mV) corresponds to the exciton binding energy at  $n_x = 0$ , which is slightly larger than in Device 1 shown in the main text ( $\sim 25$  mV) because the hBN barrier is slightly thinner ( $\sim 5$ -layer).

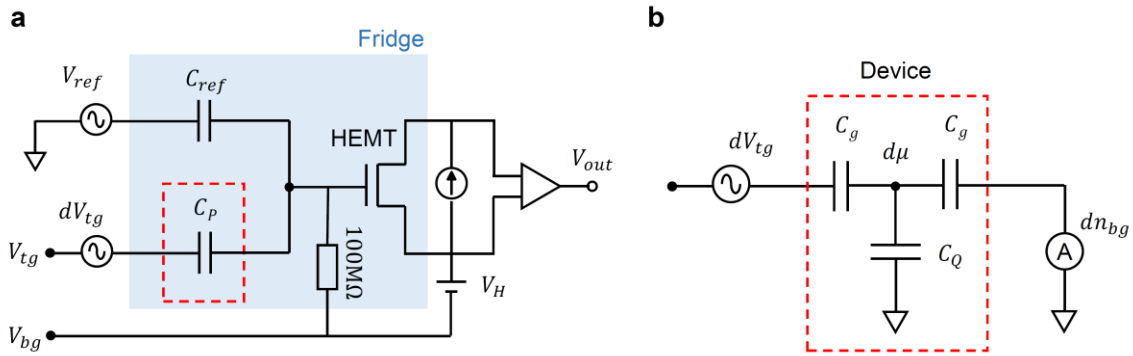

**Extended Data Figure 7 | Circuit diagram.** **a**, Circuit diagram for the penetration capacitance measurement. The red dashed line encloses the sample area. The reference part ( $V_{ref}$  and  $C_{ref}$ ) is used to cancel the parasitic background capacitance. The HEMT is biased at voltage  $V_H$ . **b**, Equivalent circuit model of  $C_p$  in **a**. Here  $C_g \approx 2C_{gg}$  is the sample-to-gate geometrical capacitance, which is about twice the gate-to-gate geometrical capacitance  $C_{gg}$ .

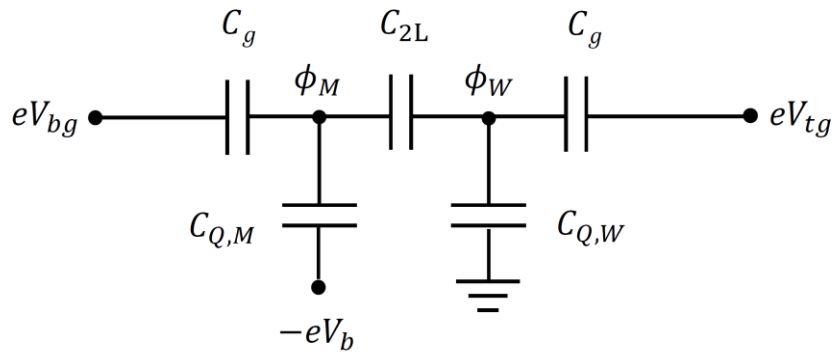

**Extended Data Figure 8 | Equivalent device circuit model for electrostatics simulation.**  $C_{Q,M}$  and  $C_{Q,W}$  are the quantum capacitances of the MoSe<sub>2</sub> and WSe<sub>2</sub> monolayers, respectively. Details see Methods.
